# Supplementary material
Source: HighWire-hosted journal article supplement (http://www.jrheum.org/highwire/filestream/31548/field_highwire_adjunct_files/0/160907DataSuppl.pdf)
Supplement: 160907DataSuppl.pdf [file 160907DataSuppl.pdf]

## ONLINE SUPPLEMENTARY CONTENT

*Supplementary Figure 1. Study population.*

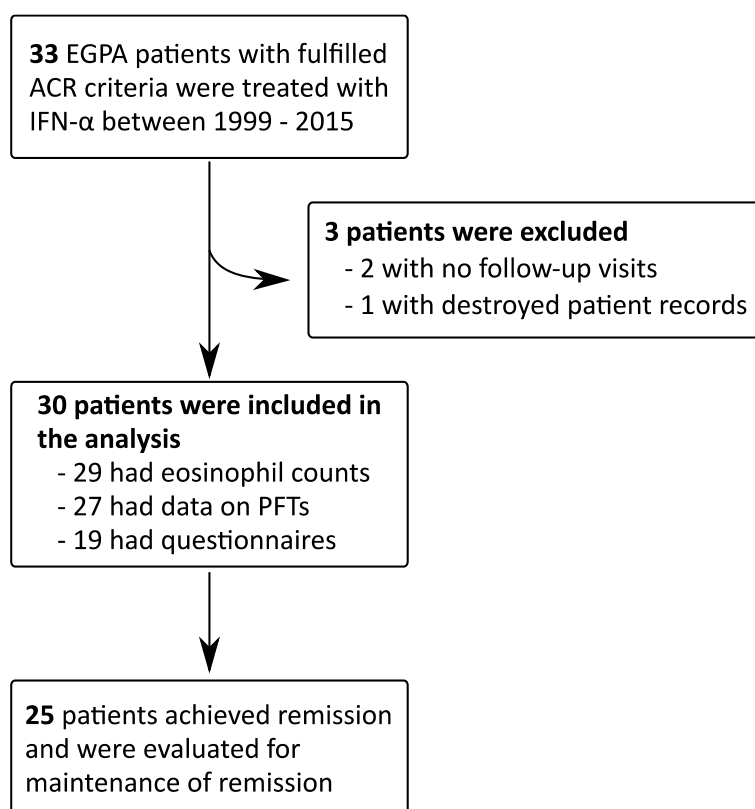

EGPA: eosinophilic granulomatosis with polyangiitis; IFN: interferon; PFTs: pulmonary function tests.

*Supplementary Table 1.* Biopsy characteristics of 30 patients with EGPA treated with Interferon- $\alpha$ .

| Characteristic, n (%)                     | All (n=30) |
|-------------------------------------------|------------|
| Biopsy performed                          | 24 (80)    |
| <i>Biopsy findings</i>                    |            |
| Small- to medium-sized-vessel vasculitis  | 11 (37)    |
| Extravascular eosinophils                 | 22 (73)    |
| Granuloma                                 | 5 (17)     |
| Vasculitis with extravascular eosinophils | 10 (67)    |
| Granuloma with extravascular eosinophils  | 3 (10)     |
| Loeffler Endocarditis                     | 4 (13)     |
| <i>Biopsy sites</i>                       |            |
| Number of organs biopsied, median (Range) | 1 (0-4)    |
| Lung                                      | 19 (63)    |
| Endomyocardium                            | 5 (17)     |
| Skin                                      | 4 (13)     |
| Liver                                     | 2 (7)      |
| Nasal sinuses                             | 2 (10)     |
| Gastrointestinal Tract                    | 4 (13)     |
| Muscle                                    | 1 (3)      |
| Nerve                                     | 1 (3)      |
| Kidney                                    | 1 (3)      |
| Retroorbital mass                         | 1 (3)      |

*Supplementary Table 2.* Features of cardiac involvement in 10 of 30 patients with EGPA treated with Interferon- $\alpha$ .

| Clinical features, n (%)                    | All (n=12) |
|---------------------------------------------|------------|
| Acute myocardial ischemia                   | 4          |
| Myocarditis                                 | 4          |
| Pericarditis                                | 5          |
| New arrhythmia                              | 5          |
| New valve regurgitation                     | 2          |
| Intracardial thrombus                       | 1          |
| Abnormal echocardiography*                  | 9          |
| Not performed                               | 1          |
| Abnormal cardiac magnetic resonance imaging | 6          |
| Not performed                               | 6          |

\* If pericardial effusion, ejection fraction <50%, wall motion abnormalities and or aortic or mitral regurgitation is present

† if additional edema or myocardial enhancement is present

*Supplementary Table 3.* Clinical surrogates for vasculitis (i.e. polyangiitis) in 19 of 30 patients with EGPA without histological evidence of vasculitis.

| Clinical vasculitis surrogate, n (%) | All (n=19) |
|--------------------------------------|------------|
| Mononeuritis simplex / multiplex*    | 5          |
| Palpable purpura                     | 2          |
| Acute myocardial ischemia†           | 2          |
| Episcleritis                         | 1          |
| Alveolar haemorrhage                 | 1          |

\* showing axonal damage on nerve conduction studies

† without evidence of coronary artery disease on cardiac catheterization

*Supplementary Table 4.* Triggers for discontinuation of Interferon- $\alpha$  therapy in 23 / 30 patients with EGPA.

| Trigger for discontinuation, n                | All patients (n=23) |
|-----------------------------------------------|---------------------|
| Lack of efficacy                              | 5                   |
| No remission induction                        | 1                   |
| Relapse*                                      | 4                   |
| Adverse events                                | 13                  |
| Depression                                    | 4                   |
| Neuropathy                                    | 3                   |
| Autoimmune hepatitis                          | 1                   |
| Liver damage                                  | 1                   |
| Anaemia                                       | 1                   |
| Alopecia                                      | 1                   |
| Nausea                                        | 1                   |
| Flushes                                       | 1                   |
| Pruritus                                      | 1                   |
| Discontinued whilst in remission†             | 3                   |
| Self-initiated discontinuation by the patient | 1                   |

At time of data collection, 7 patients were still receiving Interferon- $\alpha$  and 23 patients discontinued treatment.

\* unresponsive to dose increase of interferon- $\alpha$  or prednisolone

† for de-escalation of therapy after long-term prednisolone-free remission by treating physician in (n=2) and by the patient because of scheduled surgery (n=1)

*Supplementary Table 5.* Univariate analysis in outcomes (remission; relapse) by baseline characteristics.

| Characteristics                       | n  | Achieved remission (25/30) |                | P*    |
|---------------------------------------|----|----------------------------|----------------|-------|
|                                       |    | yes                        | no             |       |
| Organ involvement                     |    |                            |                |       |
| ENT                                   | 22 | 19                         | 3              | 0.383 |
| Cardiac                               | 10 | 7                          | 3              | 0.139 |
| Neurological                          | 8  | 6                          | 2              | 0.400 |
| Skin                                  | 7  | 4                          | 3              | 0.022 |
| Eyes                                  | 2  | 2                          | 0              | 0.520 |
| GIT                                   | 2  | 2                          | 0              | 0.520 |
| Evidence of polyangiitis <sup>†</sup> | 22 | 18                         | 4              | 0.712 |
| Relapsing EGPA                        | 8  | 7                          | 1              | 0.743 |
| FFS ( $\geq 1$ )                      | 8  | 4                          | 4              | 0.003 |
| BVAS at entry, median (IQR)           | 25 | 6 (4-10)                   | 13.5 (6-17)    | 0.332 |
| Age (years), median (IQR)             | 25 | 49 (43-55)                 | 58 (51.5-63.5) | 0.137 |
|                                       |    |                            |                |       |
| Characteristics                       | n  | Suffered relapse (16/25)   |                | P*    |
|                                       |    | yes                        | no             |       |
| Organ involvement                     |    |                            |                |       |
| ENT                                   | 19 | 13                         | 6              | 0.058 |
| Cardiac                               | 7  | 5                          | 2              | 0.658 |
| Neurological                          | 6  | 4                          | 2              | 0.776 |
| Skin                                  | 4  | 3                          | 1              | 0.549 |
| Eyes                                  | 2  | 2                          | 0              | 0.549 |
| GIT                                   | 2  | 0                          | 2              | 0.058 |
| Evidence of polyangiitis <sup>†</sup> | 19 | 13                         | 5              | 0.170 |
| Relapsing EGPA                        | 7  | 5                          | 2              | 0.525 |
| FFS ( $\geq 1$ )                      | 4  | 1                          | 3              | 0.091 |
| BVAS at entry, median (IQR)           | 21 | 6 (4-12)                   | 5 (2.5-9)      | 0.257 |
| Age (years), median (IQR)             | 21 | 50 (44-55)                 | 48 (42.5-55)   | 0.944 |

FFS: Five-Factor Score; ENT: Ear Nose Throat; GIT: Gastrointestinal-Tract; BVAS: Birmingham Vasculitis Activity Score

\*group comparison using  $\chi^2$ .

<sup>†</sup> defined as presence of necrotizing vasculitis on biopsy or strong clinical surrogate of polyangiitis (myocardial ischemia due to coronaritis; palpable purpura; episcleritis; mononeuritis multiplex, alveolar hemorrhage).
